# Supplementary material
Source: Springer Nature journal article supplement (https://www.springermedizin.de/resource/supplementary/12965_2005_25_MOESM1_ESM.pdf/9572944)

A)

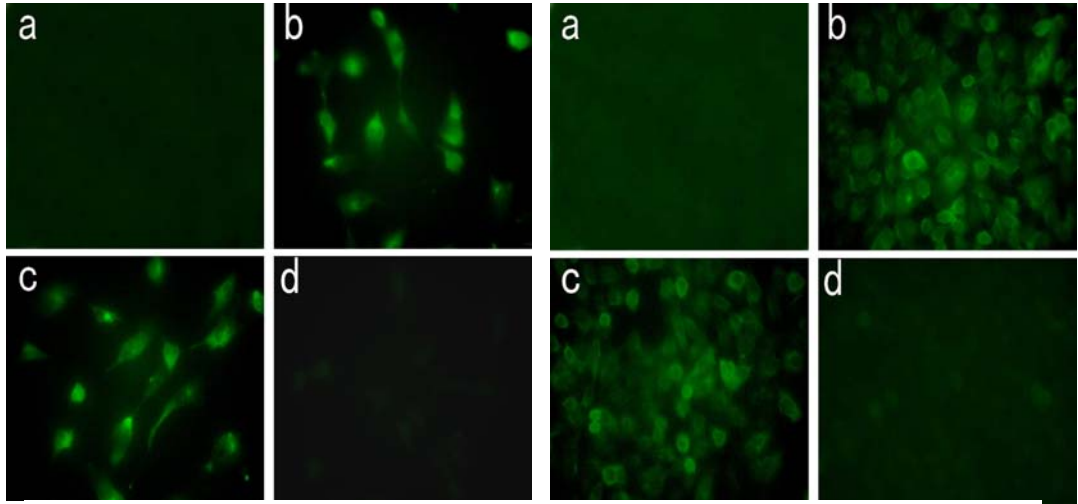

B)

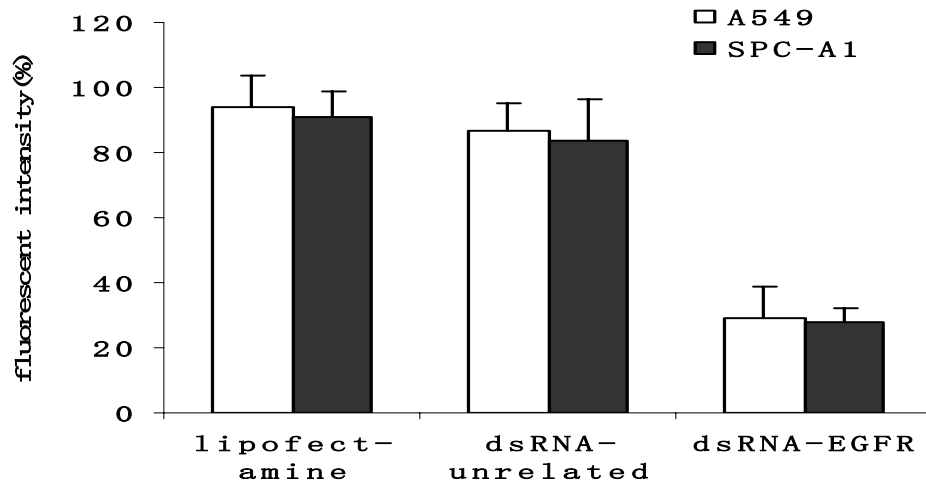

C)

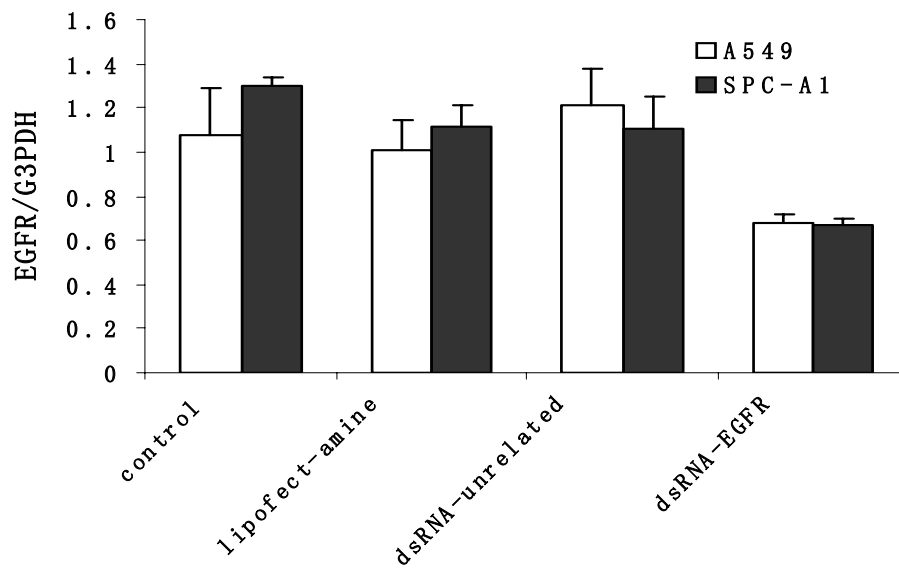

Supplement: MOESM1 [file 9572944]
